# Supplementary material for: Snow flea antifreeze peptide for cryopreservation of lactic acid bacteria
Source: PubMed Central journal article supplement (PMC8813996; doi:10.1038/s41538-022-00128-4), 2022-02-03
Supplement: 41538_2022_128_MOESM1_ESM.pdf [file 41538_2022_128_MOESM1_ESM.pdf]

# **Snow flea antifreeze peptide: An excellent antifreeze agent for cryopreservation of lactic acid bacteria**

Xu Chen<sup>1,2,†</sup>, Jinhong Wu<sup>3,†</sup>, Xiaozhen Li<sup>1</sup>, Fujia Yang<sup>1,2</sup>, Jianlian Huang<sup>4,5</sup>, Shaoyun Wang<sup>2,\*</sup>, Vincent Guyonnet<sup>6</sup>

<sup>1</sup> College of Biological Science and Engineering, Fuzhou University, Fuzhou, Fujian 350108, China

<sup>2</sup> College of Chemical Engineering, Fuzhou University, Fuzhou, Fujian 350108, China

<sup>3</sup> Department of Food Science and Engineering, School of Agriculture and Biology, Shanghai Jiao Tong University, Shanghai 200240, China

<sup>4</sup> Fujian Provincial Key Laboratory of Frozen Processed Aquatic Products, Xiamen 361022, China

<sup>5</sup> Fujian Anjoy Food Co. Ltd., Xiamen 361022, China

<sup>6</sup> FFI Consulting Ltd, 2488 Lyn Road, Brockville ON K6V 5T3, Canada

---

†Xu Chen and Jinhong Wu are contributed equal to this paper.

**\* Corresponding author:**

Prof. Dr. Shaoyun Wang

College of Biological Science and Engineering, Fuzhou University, China

E-mail: [shywang@fzu.edu.cn](mailto:shywang@fzu.edu.cn)

Tel: +86-591-22866375. Fax: +86-591-22866278.

Sequence: Untitled.dna (Linear / 543 bp)  
Features: 1 total

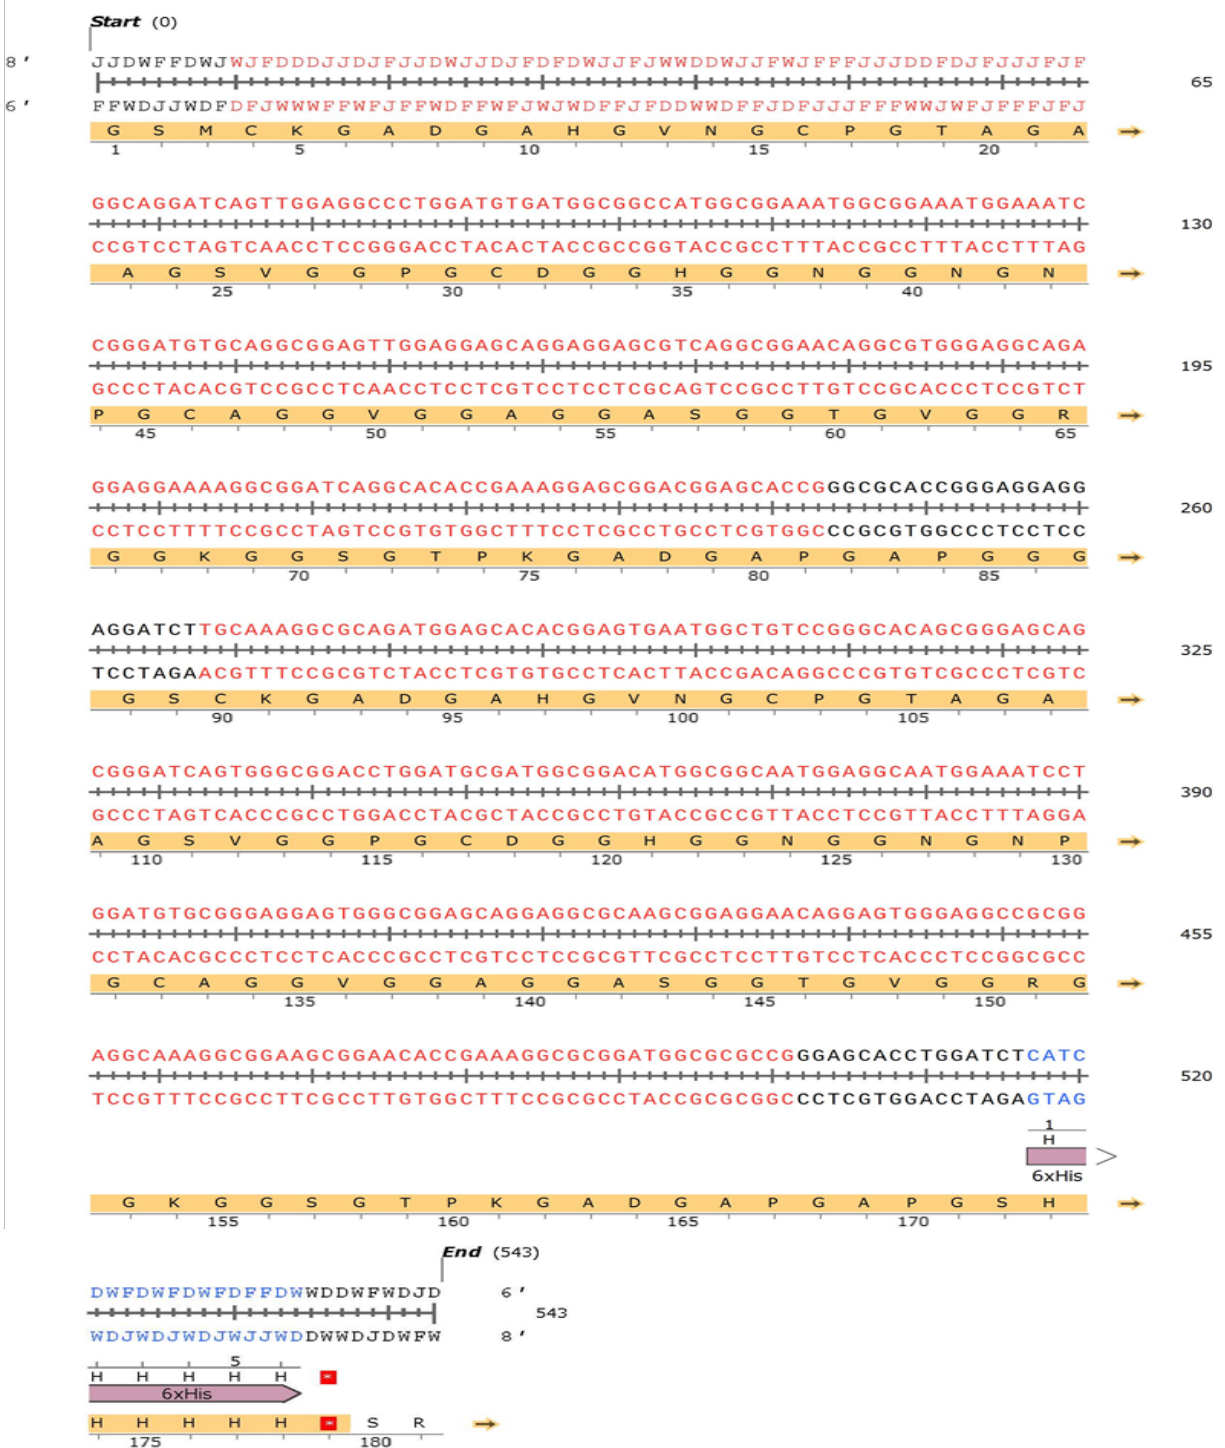

Supplementary Figure 1. **The amino acid and corresponding DNA sequences of rsfAFP.** The figure was created by SnapGene 4.1.9. DNA sequencing was performed using NCBI BLAST tools (<https://blast.ncbi.nlm.nih.gov/Blast.cgi>), which confirmed an exact sequence match.

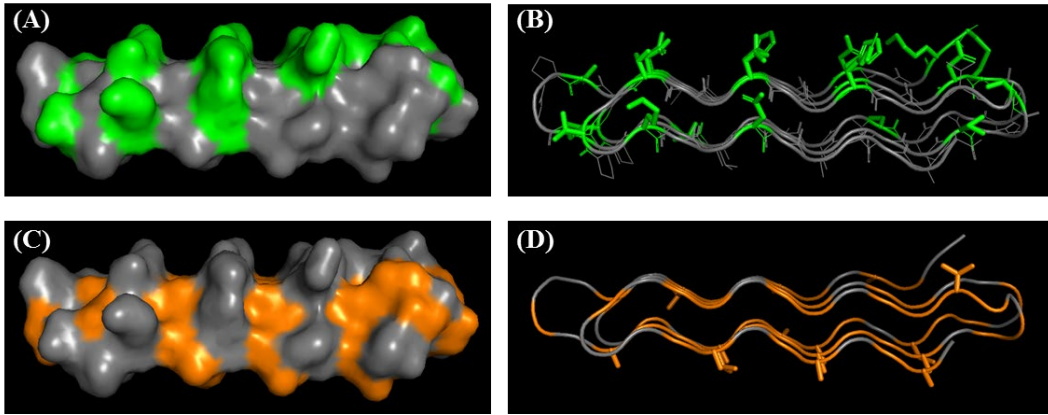

Supplementary Figure 2. **Spatial structure analysis of rsfAFP.** (A) and (B) are the ice-binding faces (IBF); (C) and (D) are the non-ice-binding faces (NIBF).

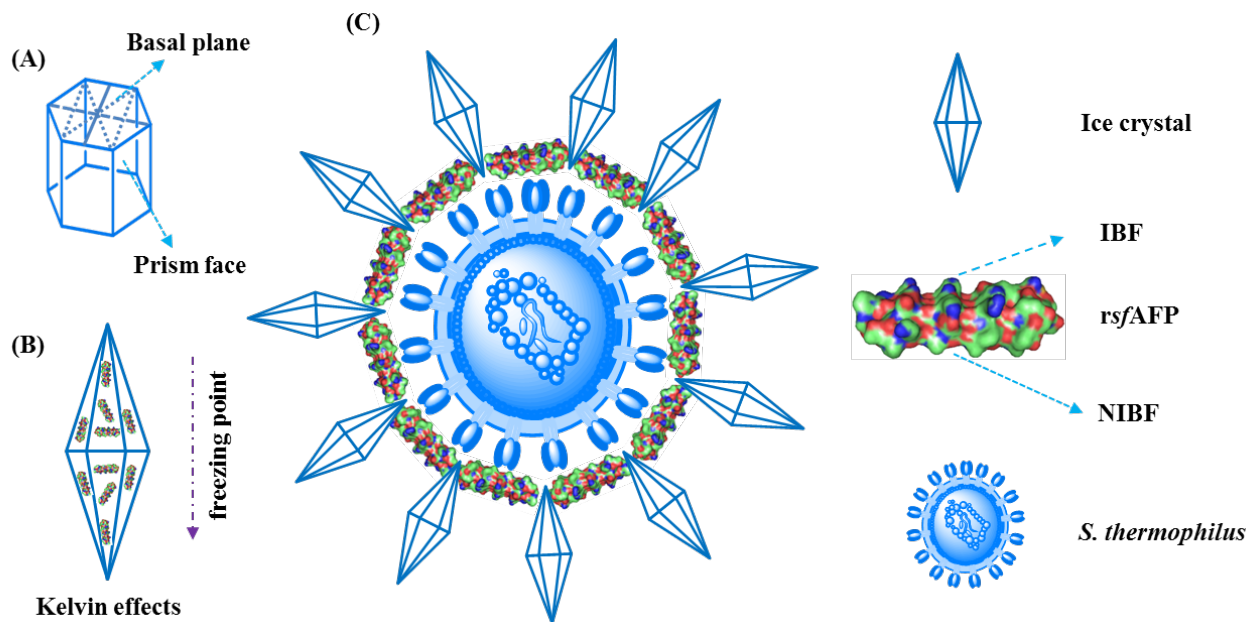

Supplementary Figure 3. **Cryoprotective mechanism of rsfAFP on *S. thermophilus* during freezing and frozen stage.** (A) Typical ice crystal morphology; (B) Interaction between rsfAFP and the prism surface changes the growth trajectory of ice crystals; (C) Models of rsfAFP interacting with ice crystals and *S. thermophilus*. IBF, Ice-binding face; NIBF, Non-ice-binding face.
